# Supplementary material for: The impact of lifestyle and reproductive factors on the risk of a second new primary cancer in the contralateral breast: a systematic review and meta-analysis
Source: Springer Nature journal article supplement (doi:10.1007/s10552-020-01284-2), 2020-03-04
Supplement: MOESM1 [file 17770200]

## Supplementary Material

**Supplementary Table S1: Search strategy used to identify publications publishing on lifestyle and/or reproductive risk factors for contralateral breast cancer in the PubMed electronic database.**

| <b>Number</b> | <b>Search term</b>                                                                                                                                                                                                                                                                                                                                                           |
|---------------|------------------------------------------------------------------------------------------------------------------------------------------------------------------------------------------------------------------------------------------------------------------------------------------------------------------------------------------------------------------------------|
| 1             | “(Contralateral Breast Cancer* [tiab] OR Contralateral Breast Tumor* [tiab] OR Contralateral Breast Tumour* [tiab] OR Contralateral Breast Neoplasm* [tiab] OR CBC [tiab] OR (Breast Neoplasms [MeSH] AND Contralateral [tiab]) OR (Breast Neoplasms [MeSH] AND Neoplasms, Second Primary [MeSH]) OR Second Primary Breast Cancer [tiab] OR Second Breast Cancer [tiab]) AND |
| 2             | ("Health Behavior"[MeSH] OR "Food Habits"[MeSH] OR "Exercise"[MeSH] OR "Smoking"[MeSH] OR Smoking [tiab] OR "Alcohol Drinking"[MeSH] OR "Body Mass Index"[MeSH] OR "Obesity"[MeSH] OR Obes* [tiab] OR "Life Style"[MeSH] OR Life Style [tiab] OR Lifestyl* [tiab]                                                                                                            |
| 3             | OR “Parity”[MeSH] OR Parity [tiab] OR Parities [tiab] OR Primiparit* [tiab] OR Multiparit* [tiab] OR “Menarche”[MeSH] OR Menarche [tiab] OR "Menopause"[MeSH] OR Menopaus* [tiab] OR “Contraceptives, Oral, Hormonal”[MeSH] OR Contracepti* [tiab] OR "Breast Feeding"[Mesh] OR Breast feeding [tiab] OR “Reproductive History”[MeSH] OR Reproductive Histor* [tiab])”.      |

Search terms for contralateral breast cancer (number 1) were combined with search terms for lifestyle factors (number 2) and reproductive factors (number 3) .

Restrictions: publication date from 01/01/1990 onwards, papers published in English

## Supplementary Figures

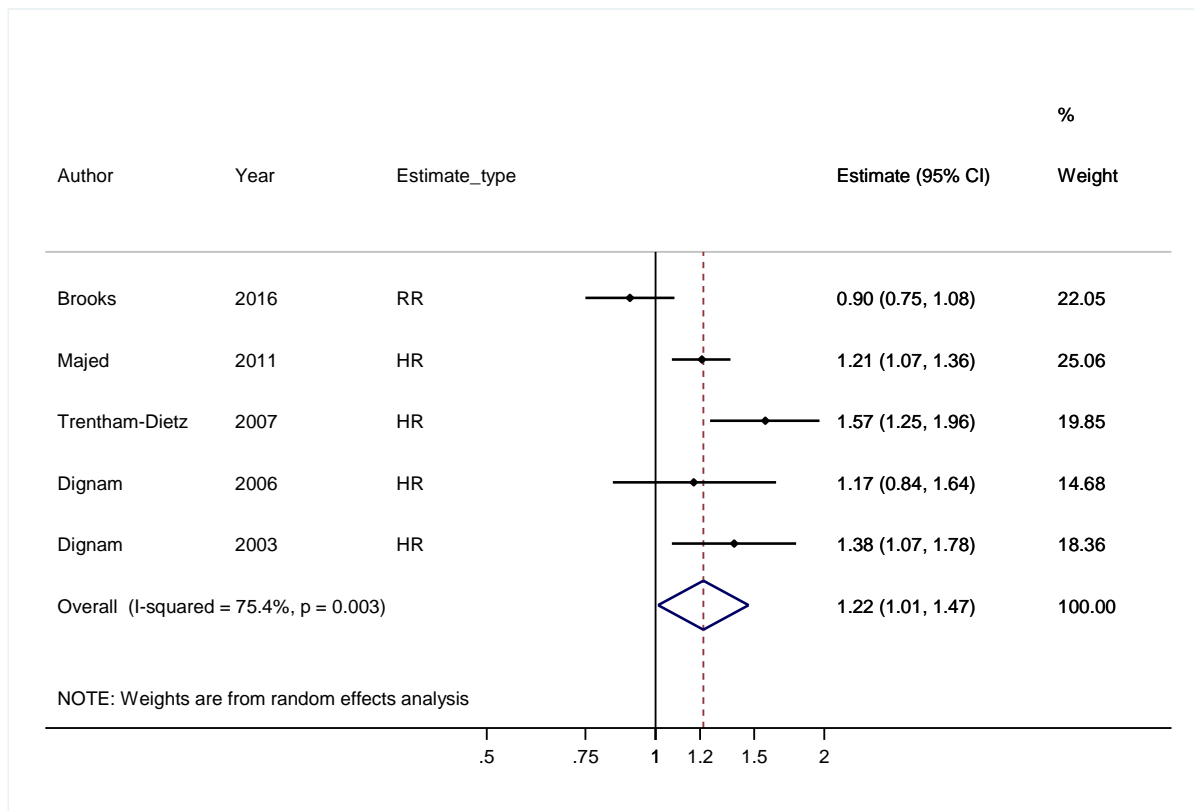

**Supplementary Figure S1: Forest plot of the included publications publishing adjusted estimates on the risk of developing contralateral breast cancer in population-based cohorts comparing body mass index ( $\text{kg}/\text{m}^2$ ):  $\geq 25$  vs  $< 25$ .**

Author=first author; Year=year of publication; Estimate\_type=type of risk estimate provided, which can be a relative risk (RR), odds ratio (OR), hazard ratio (HR); Estimate=reported adjusted estimate (i.e. relative risk, odds ratio or hazard ratio); Weight=value assigned by random-effects analysis using the inverse of the study variance (variance includes within-study variance plus the between-study variance); Overall=relative risk estimate combining relative risks, odds ratios and hazard ratios; I-squared=measure of heterogeneity; p-value=p-value for heterogeneity,  $p < 0.05$  considered significant.

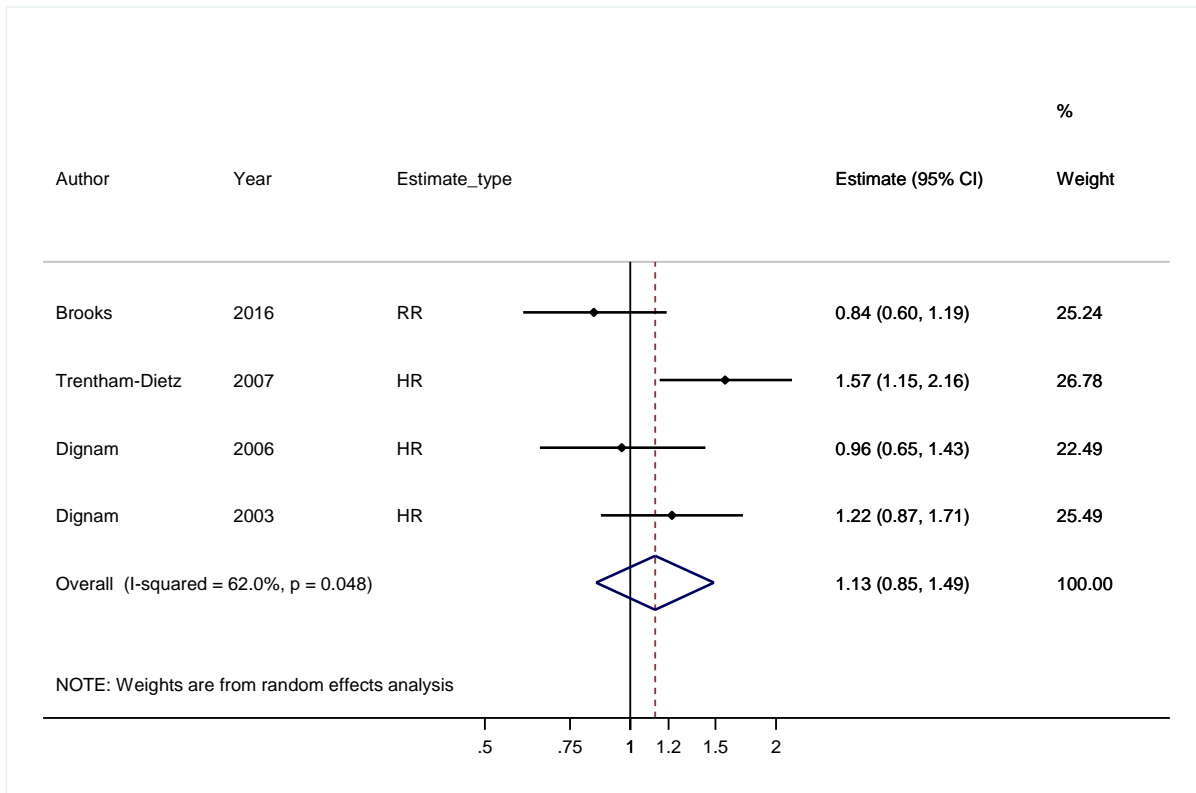

**Supplementary Figure S2: Forest plot of the included publications publishing adjusted estimates on the risk of developing contralateral breast cancer in population-based cohorts comparing body mass index (kg/m<sup>2</sup>): 25-<30 vs <25.**

Author=first author; Year=year of publication; Estimate\_type=type of risk estimate provided, which can be a relative risk (RR), odds ratio (OR), hazard ratio (HR); Estimate=reported adjusted estimate (i.e. relative risk, odds ratio or hazard ratio); Weight=value assigned by random-effects analysis using the inverse of the study variance (variance includes within-study variance plus the between-study variance); Overall=relative risk estimate combining relative risks, odds ratios and hazard ratios; I-squared=measure of heterogeneity; p-value=p-value for heterogeneity, p<0.05 considered significant.

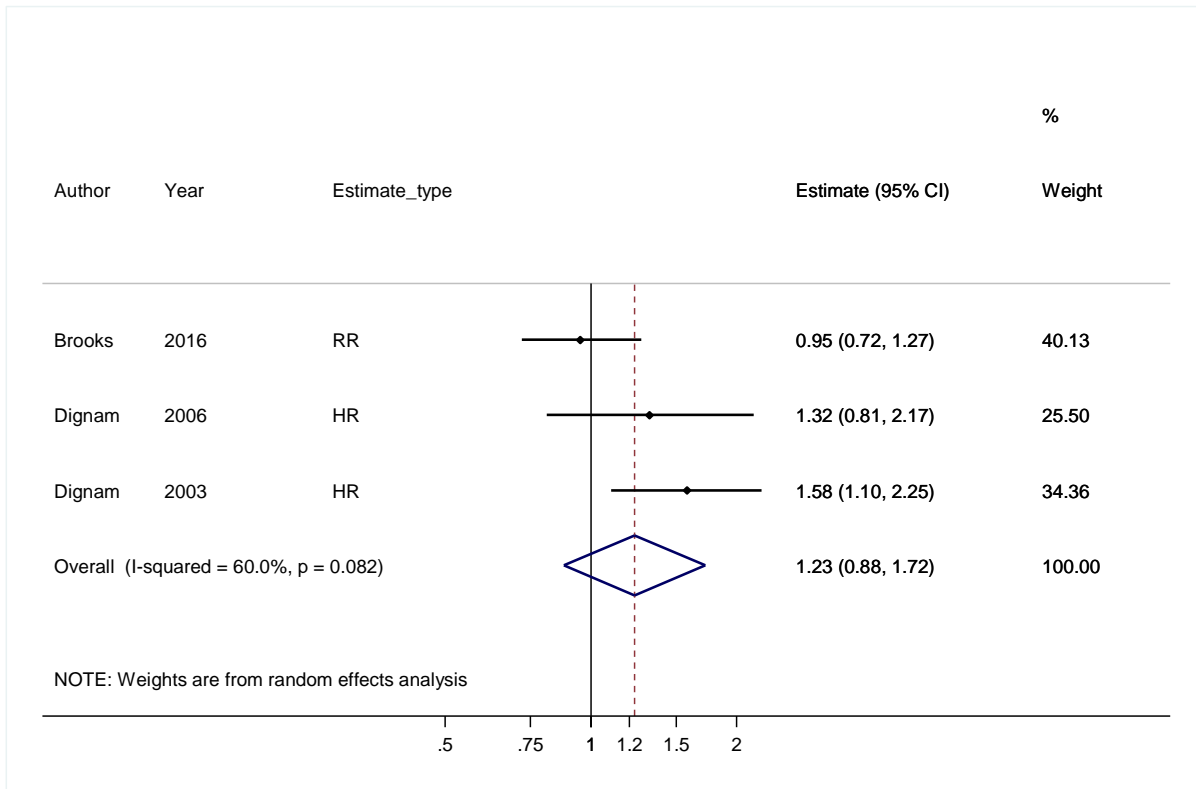

**Supplementary Figure S3: Forest plot of the included publications publishing adjusted estimates on the risk of developing contralateral breast cancer in population-based cohorts comparing body mass index (kg/m<sup>2</sup>): ≥30 vs <25.**

Author=first author; Year=year of publication; Estimate\_type=type of risk estimate provided, which can be a relative risk (RR), odds ratio (OR), hazard ratio (HR); Estimate=reported adjusted estimate (i.e. relative risk, odds ratio or hazard ratio); Weight=value assigned by random-effects analysis using the inverse of the study variance (variance includes within-study variance plus the between-study variance); Overall=relative risk estimate combining relative risks, odds ratios and hazard ratios; I-squared=measure of heterogeneity; p-value=p-value for heterogeneity, p<0.05 considered significant.

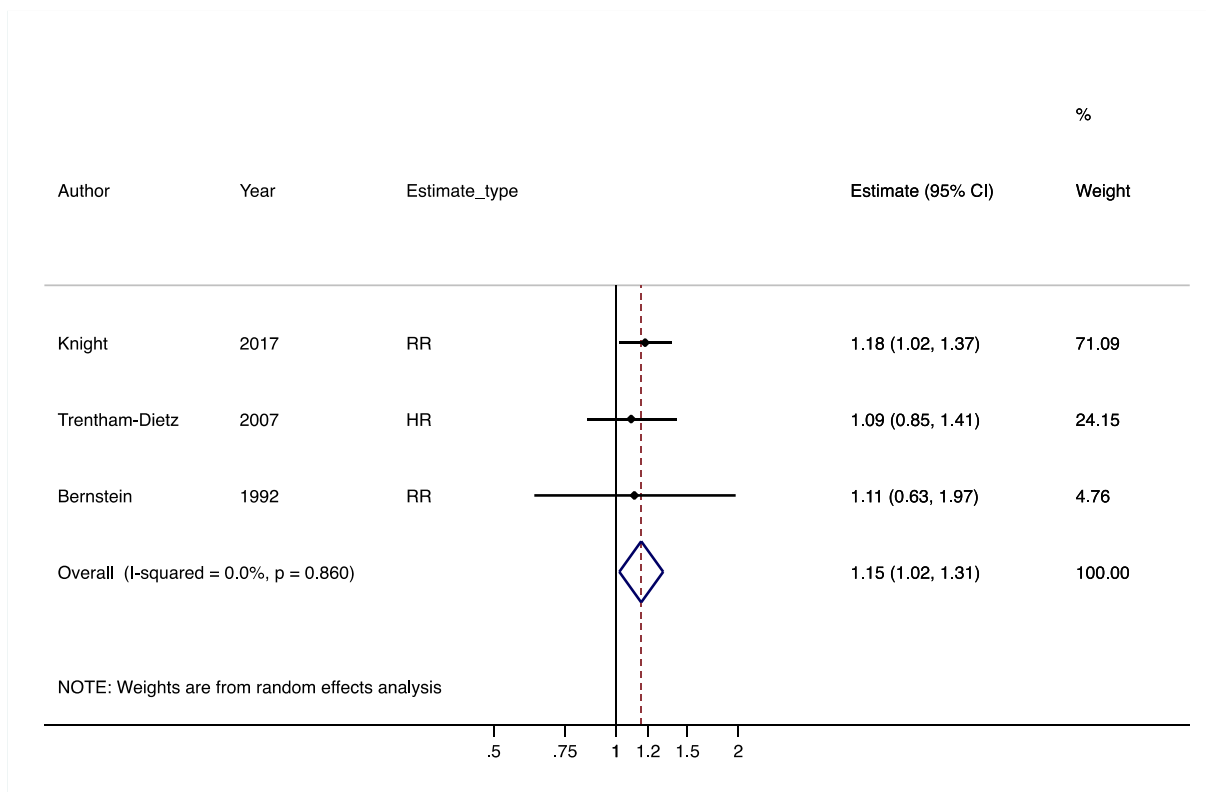

**Supplementary Figure S4: Forest plot of the included publications publishing adjusted estimates on the risk of developing contralateral breast cancer in population-based cohorts comparing alcohol use: ever vs never.**

Author=first author; Year=year of publication; Estimate\_type=type of risk estimate provided, which can be a relative risk (RR), odds ratio (OR), hazard ratio (HR); Estimate=reported adjusted estimate (i.e. relative risk, odds ratio or hazard ratio); Weight=value assigned by random-effects analysis using the inverse of the study variance (variance includes within-study variance plus the between-study variance); Overall=relative risk estimate combining relative risks, odds ratios and hazard ratios; I-squared=measure of heterogeneity; p-value=p-value for heterogeneity, p<0.05 considered significant.

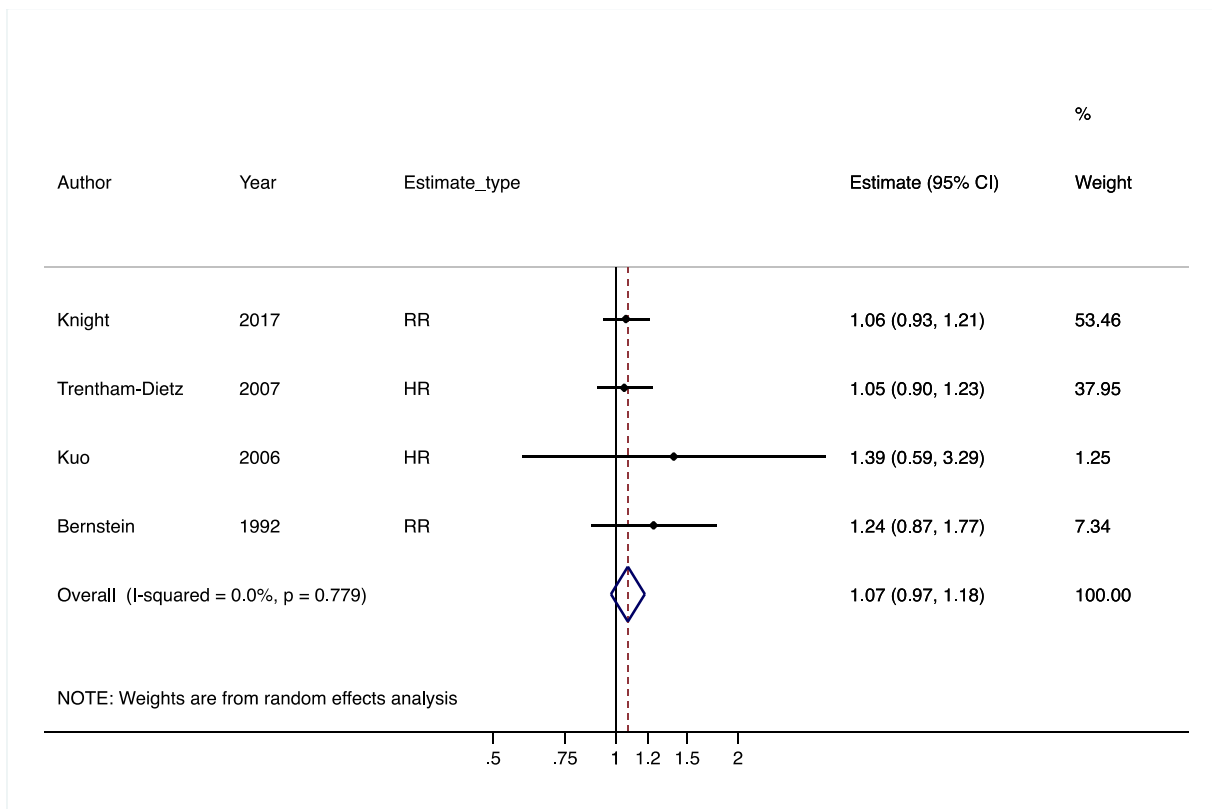

**Supplementary Figure S5: Forest plot of the included publications publishing adjusted estimates on the risk of developing contralateral breast cancer in population-based cohorts comparing smoking status: ever vs never.**

Author=first author; Year=year of publication; Estimate\_type=type of risk estimate provided, which can be a relative risk (RR), odds ratio (OR), hazard ratio (HR); Estimate=reported adjusted estimate (i.e. relative risk, odds ratio or hazard ratio); Weight=value assigned by random-effects analysis using the inverse of the study variance (variance includes within-study variance plus the between-study variance); Overall=relative risk estimate combining relative risks, odds ratios and hazard ratios; I-squared=measure of heterogeneity; p-value=p-value for heterogeneity,  $p < 0.05$  considered significant.

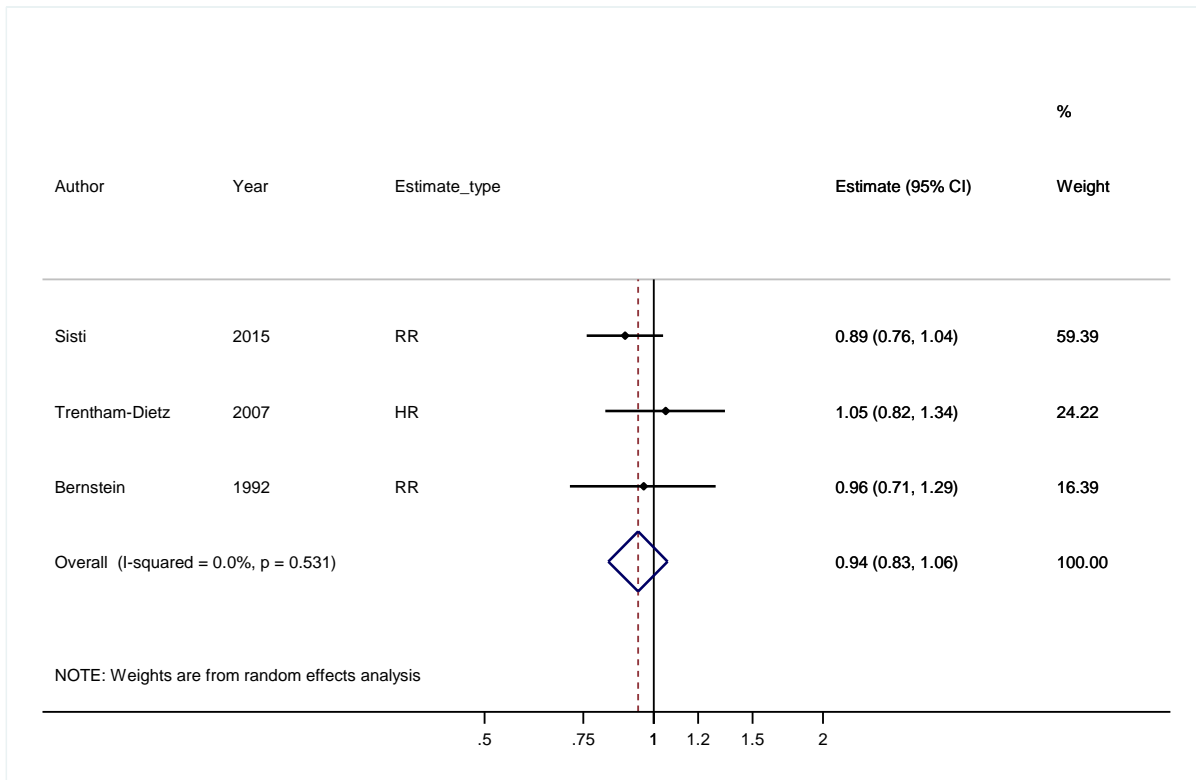

**Supplementary Figure S6: Forest plot of the included publications publishing adjusted estimates on the risk of developing contralateral breast cancer in population-based cohorts comparing menarche (years):  $\geq 13$  vs  $< 13$ .**

Author=first author; Year=year of publication; Estimate\_type=type of risk estimate provided, which can be a relative risk (RR), odds ratio (OR), hazard ratio (HR); Estimate=reported adjusted estimate (i.e. relative risk, odds ratio or hazard ratio); Weight=value assigned by random-effects analysis using the inverse of the study variance (variance includes within-study variance plus the between-study variance); Overall=relative risk estimate combining relative risks, odds ratios and hazard ratios; I-squared=measure of heterogeneity; p-value=p-value for heterogeneity,  $p < 0.05$  considered significant.

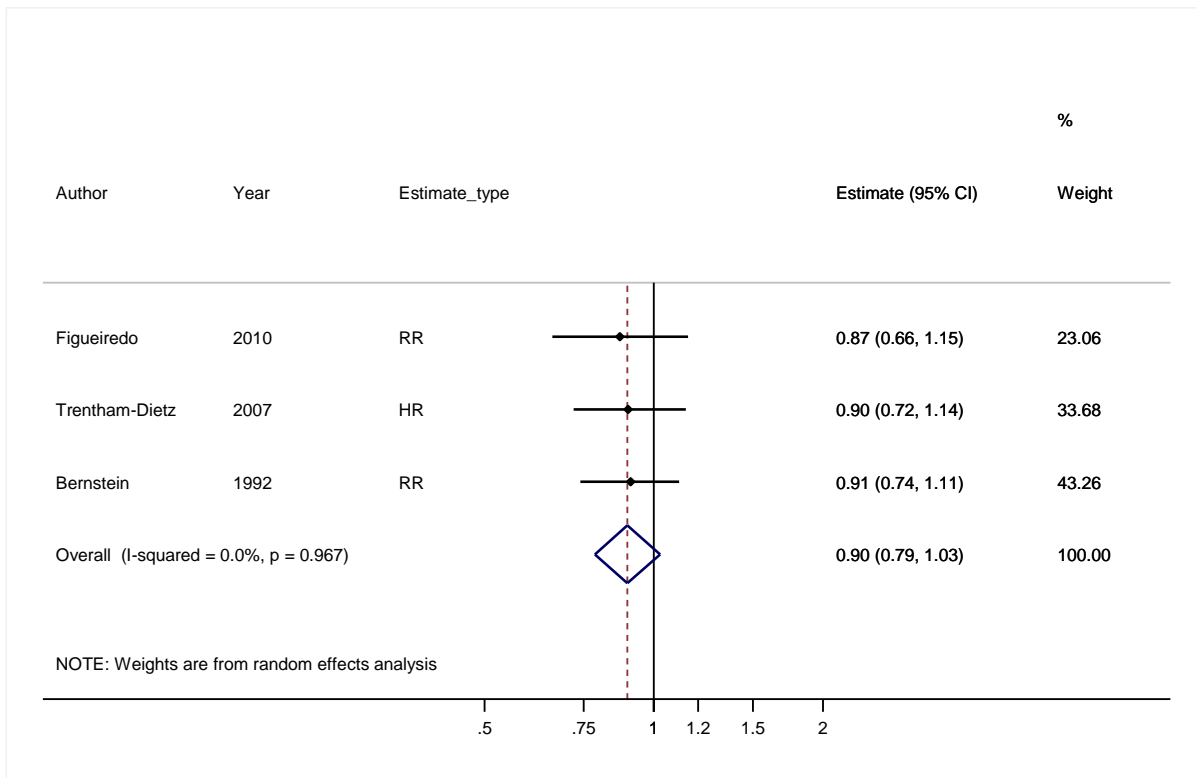

**Supplementary Figure S7: Forest plot of the included publications publishing adjusted estimates on the risk of developing contralateral breast cancer in population-based cohorts comparing oral contraceptive use: ever vs never.**

Author=first author; Year=year of publication; Estimate\_type=type of risk estimate provided, which can be a relative risk (RR), odds ratio (OR), hazard ratio (HR); Estimate=reported adjusted estimate (i.e. relative risk, odds ratio or hazard ratio); Weight=value assigned by random-effects analysis using the inverse of the study variance (variance includes within-study variance plus the between-study variance); Overall=relative risk estimate combining relative risks, odds ratios and hazard ratios; I-squared=measure of heterogeneity; p-value=p-value for heterogeneity,  $p < 0.05$  considered significant.



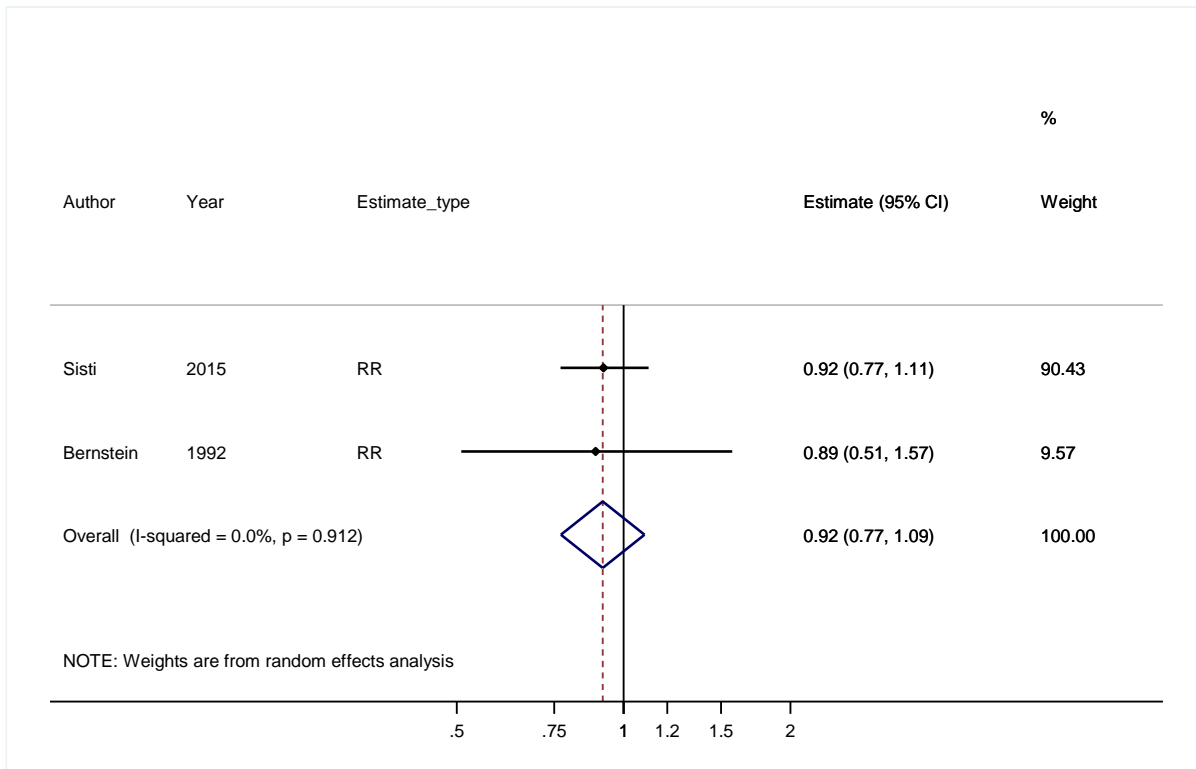

**Supplementary Figure S8: Forest plot of the included publications publishing adjusted estimates on the risk of developing contralateral breast cancer in population-based cohorts comparing gravidity: ever vs never.**

Author=first author; Year=year of publication; Estimate\_type=type of risk estimate provided, which can be a relative risk (RR), odds ratio (OR), hazard ratio (HR); Estimate=reported adjusted estimate (i.e. relative risk, odds ratio or hazard ratio); Weight=value assigned by random-effects analysis using the inverse of the study variance (variance includes within-study variance plus the between-study variance); Overall=relative risk estimate combining relative risks, odds ratios and hazard ratios; I-squared=measure of heterogeneity; p-value=p-value for heterogeneity,  $p < 0.05$  considered significant.

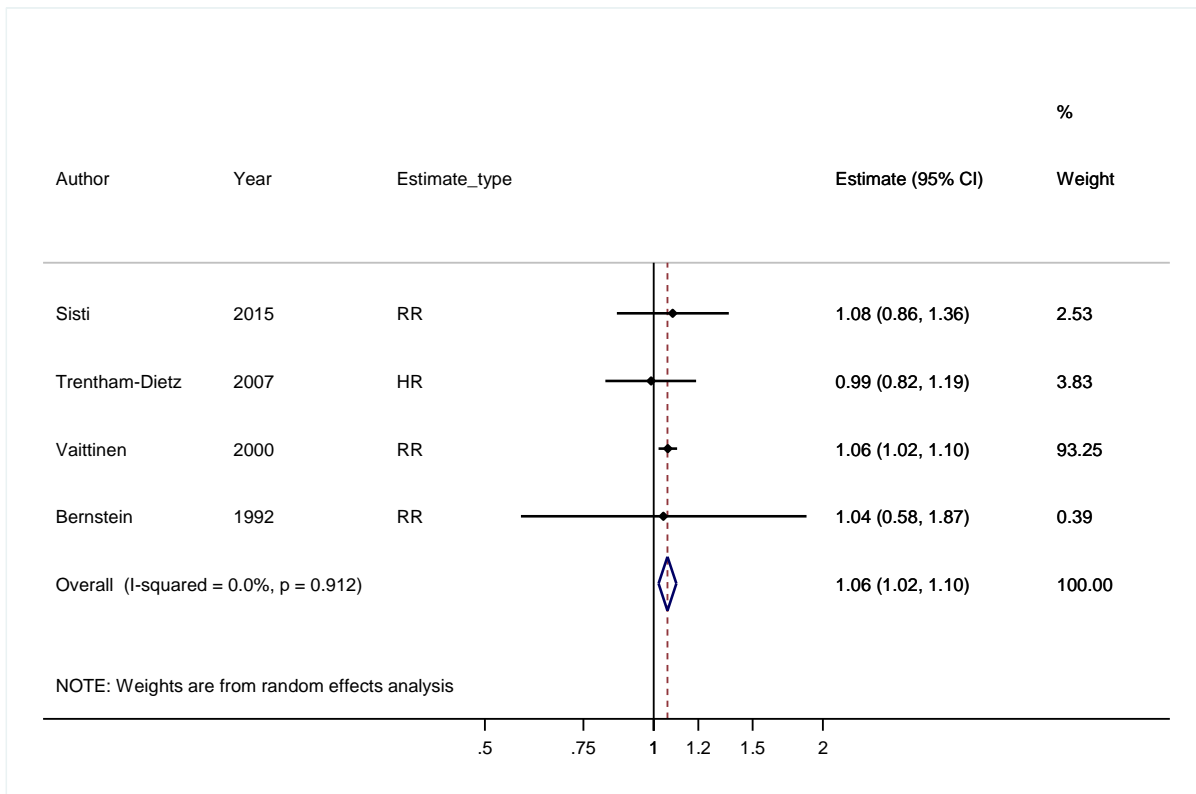

**Supplementary Figure S9: Forest plot of the included publications publishing adjusted estimates on the risk of developing contralateral breast cancer in population-based cohorts comparing age at primiparity (years):  $\geq 25$  vs  $< 25$ .**

Author=first author; Year=year of publication; Estimate\_type=type of risk estimate provided, which can be a relative risk (RR), odds ratio (OR), hazard ratio (HR); Estimate=reported adjusted estimate (i.e. relative risk, odds ratio or hazard ratio); Weight=value assigned by random-effects analysis using the inverse of the study variance (variance includes within-study variance plus the between-study variance); Overall=relative risk estimate combining relative risks, odds ratios and hazard ratios; I-squared=measure of heterogeneity; p-value=p-value for heterogeneity,  $p < 0.05$  considered significant.

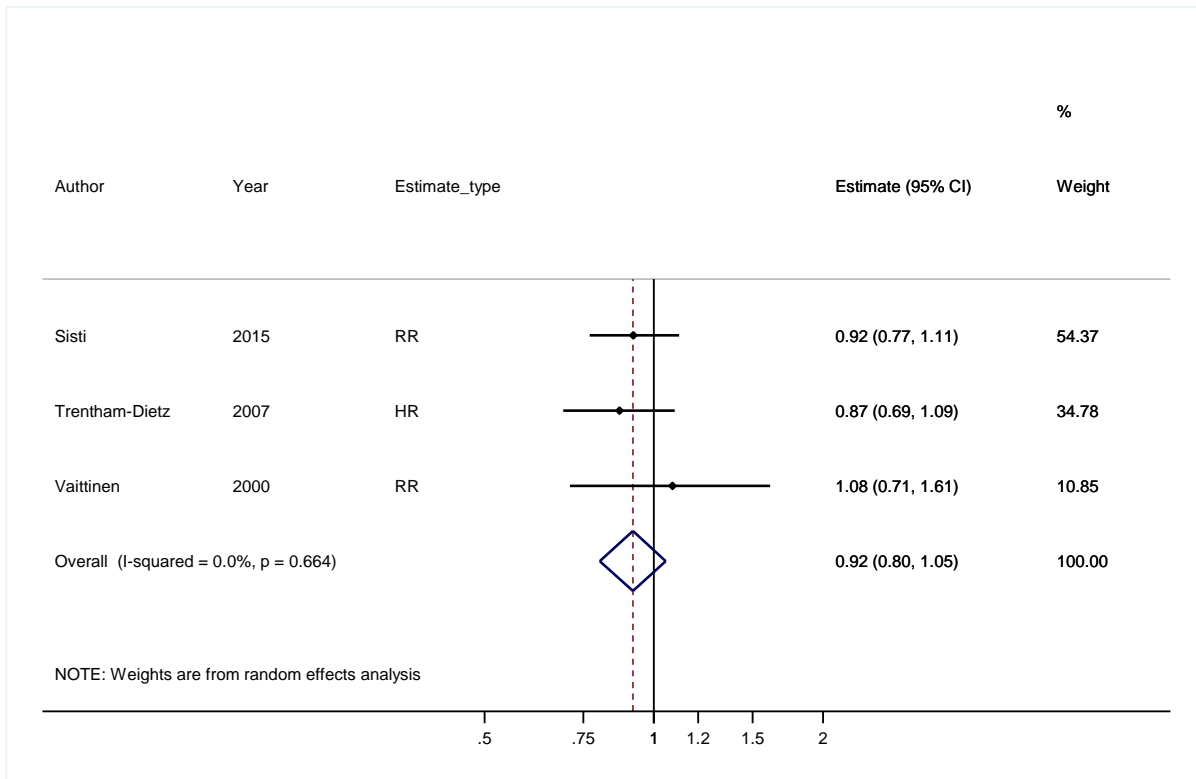

**Supplementary Figure S10: Forest plot of the included publications publishing adjusted estimates on the risk of developing contralateral breast cancer in population-based cohorts comparing parity:  $\geq 1$  full-term pregnancies vs nulliparous.**

Author=first author; Year=year of publication; Estimate\_type=type of risk estimate provided, which can be a relative risk (RR), odds ratio (OR), hazard ratio (HR); Estimate=reported adjusted estimate (i.e. relative risk, odds ratio or hazard ratio); Weight=value assigned by random-effects analysis using the inverse of the study variance (variance includes within-study variance plus the between-study variance); Overall=relative risk estimate combining relative risks, odds ratios and hazard ratios; I-squared=measure of heterogeneity; p-value=p-value for heterogeneity,  $p < 0.05$  considered significant.

FTPs=full-term pregnancies.

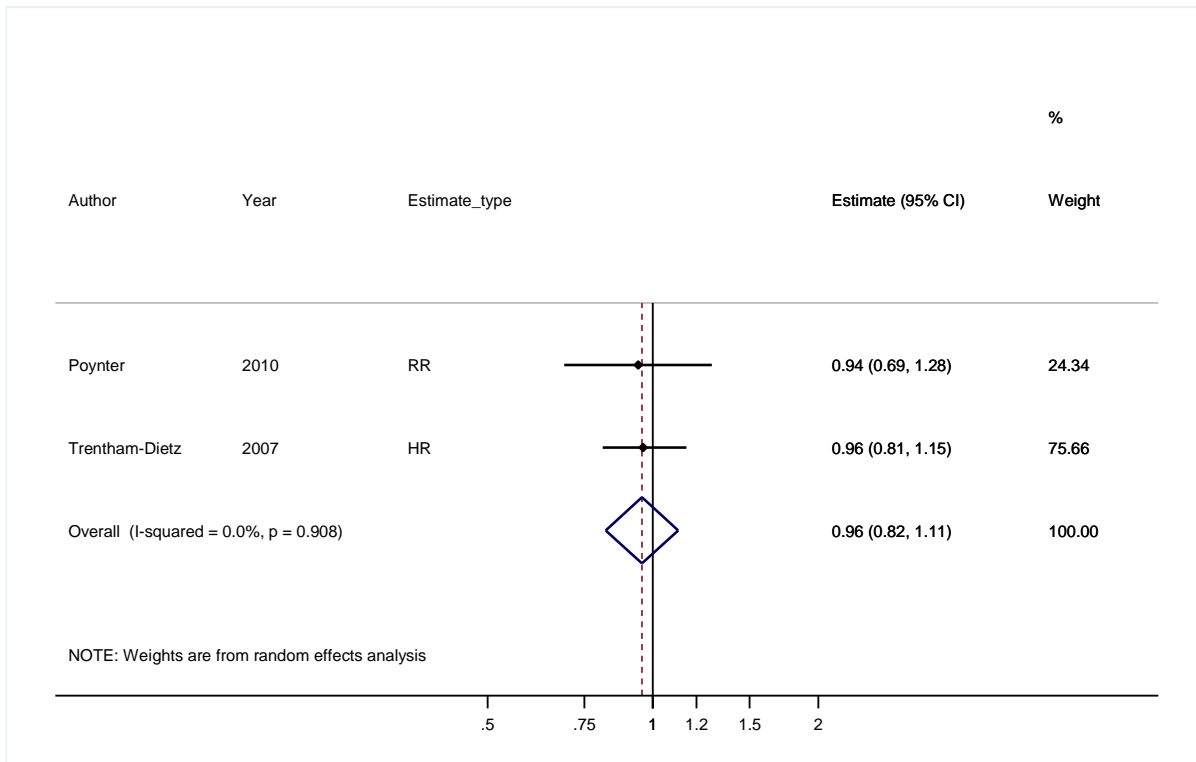

**Supplementary Figure S11: Forest plot of the included publications publishing adjusted estimates on the risk of developing contralateral breast cancer in population-based cohorts comparing parity: 1-3 full-term pregnancies vs nulliparous.**

Author=first author; Year=year of publication; Estimate\_type=type of risk estimate provided, which can be a relative risk (RR), odds ratio (OR), hazard ratio (HR); Estimate=reported adjusted estimate (i.e. relative risk, odds ratio or hazard ratio); Weight=value assigned by random-effects analysis using the inverse of the study variance (variance includes within-study variance plus the between-study variance); Overall=relative risk estimate combining relative risks, odds ratios and hazard ratios; I-squared=measure of heterogeneity; p-value=p-value for heterogeneity, p<0.05 considered significant.

FTPs=full-term pregnancies.

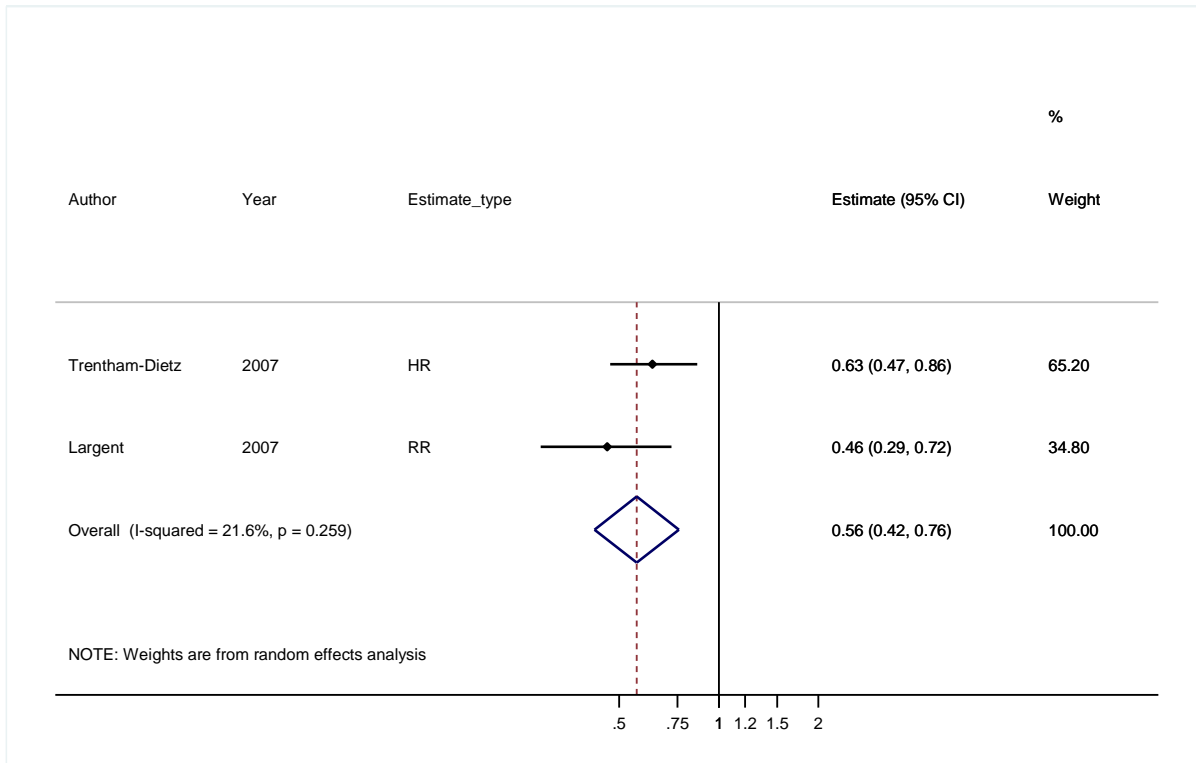

**Supplementary Figure S12: Forest plot of the included publications publishing adjusted estimates on the risk of developing contralateral breast cancer in population-based cohorts comparing parity:  $\geq 4$  full-term pregnancies vs nulliparous.**

Author=first author; Year=year of publication; Estimate\_type=type of risk estimate provided, which can be a relative risk (RR), odds ratio (OR), hazard ratio (HR); Estimate=reported adjusted estimate (i.e. relative risk, odds ratio or hazard ratio); Weight=value assigned by random-effects analysis using the inverse of the study variance (variance includes within-study variance plus the between-study variance); Overall=relative risk estimate combining relative risks, odds ratios and hazard ratios; I-squared=measure of heterogeneity; p-value=p-value for heterogeneity,  $p < 0.05$  considered significant.

FTPs=full-term pregnancies.

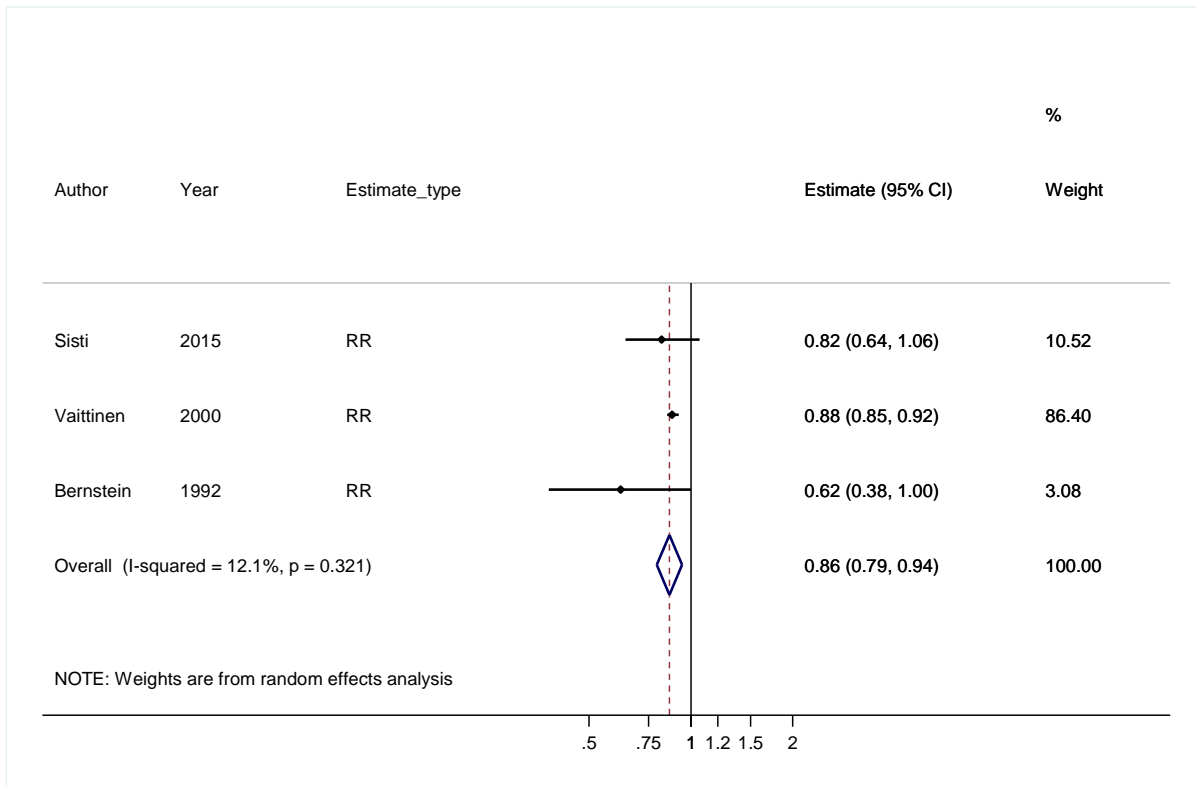

**Supplementary Figure S13: Forest plot of the included publications publishing adjusted estimates on the risk of developing contralateral breast cancer in population-based cohorts comparing parity:  $\geq 2$  full-term pregnancies vs 1 full-term pregnancy.**

Author=first author; Year=year of publication; Estimate\_type=type of risk estimate provided, which can be a relative risk (RR), odds ratio (OR), hazard ratio (HR); Estimate=reported adjusted estimate (i.e. relative risk, odds ratio or hazard ratio); Weight=value assigned by random-effects analysis using the inverse of the study variance (variance includes within-study variance plus the between-study variance); Overall=relative risk estimate combining relative risks, odds ratios and hazard ratios; I-squared=measure of heterogeneity; p-value=p-value for heterogeneity,  $p < 0.05$  considered significant.

FTPs= full-term pregnancies.

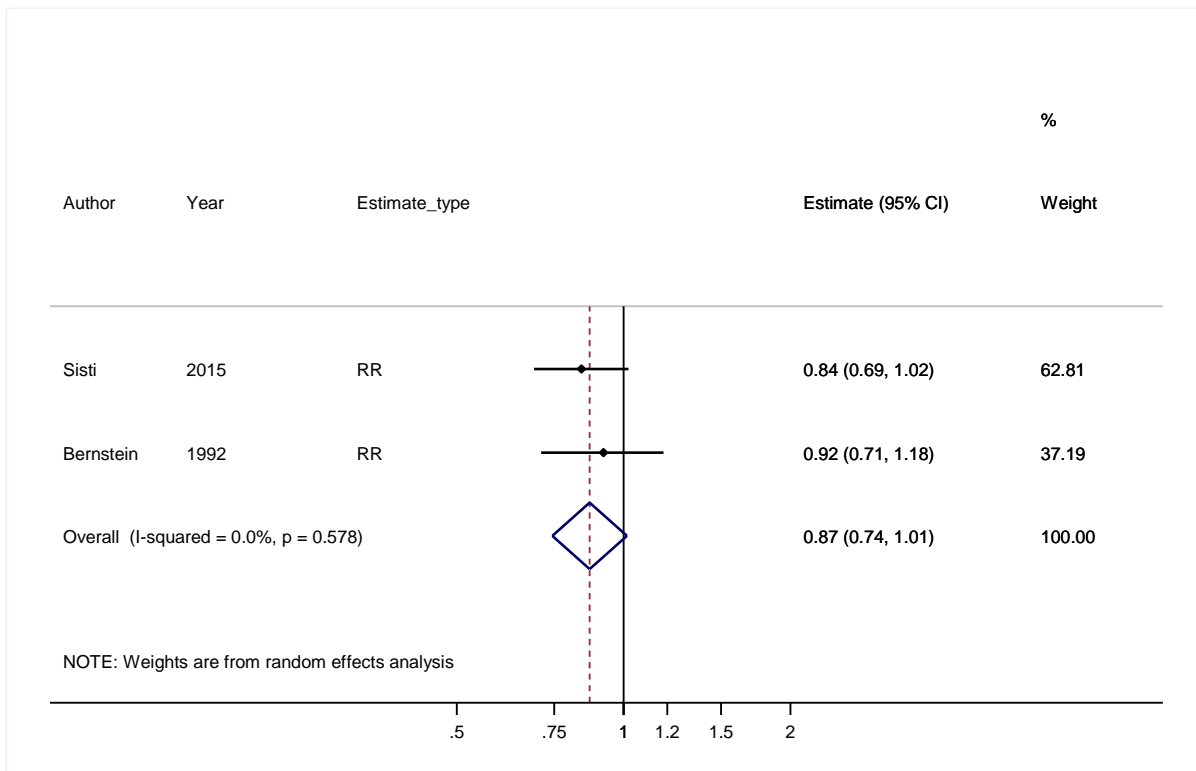

**Supplementary Figure S14: Forest plot of the included publications publishing adjusted estimates on the risk of developing contralateral breast cancer in population-based cohorts comparing breastfeeding: ever vs never.**

Author=first author; Year=year of publication; Estimate\_type=type of risk estimate provided, which can be a relative risk (RR), odds ratio (OR), hazard ratio (HR); Estimate=reported adjusted estimate (i.e. relative risk, odds ratio or hazard ratio); Weight=value assigned by random-effects analysis using the inverse of the study variance (variance includes within-study variance plus the between-study variance); Overall=relative risk estimate combining relative risks, odds ratios and hazard ratios; I-squared=measure of heterogeneity; p-value=p-value for heterogeneity, p<0.05 considered significant.

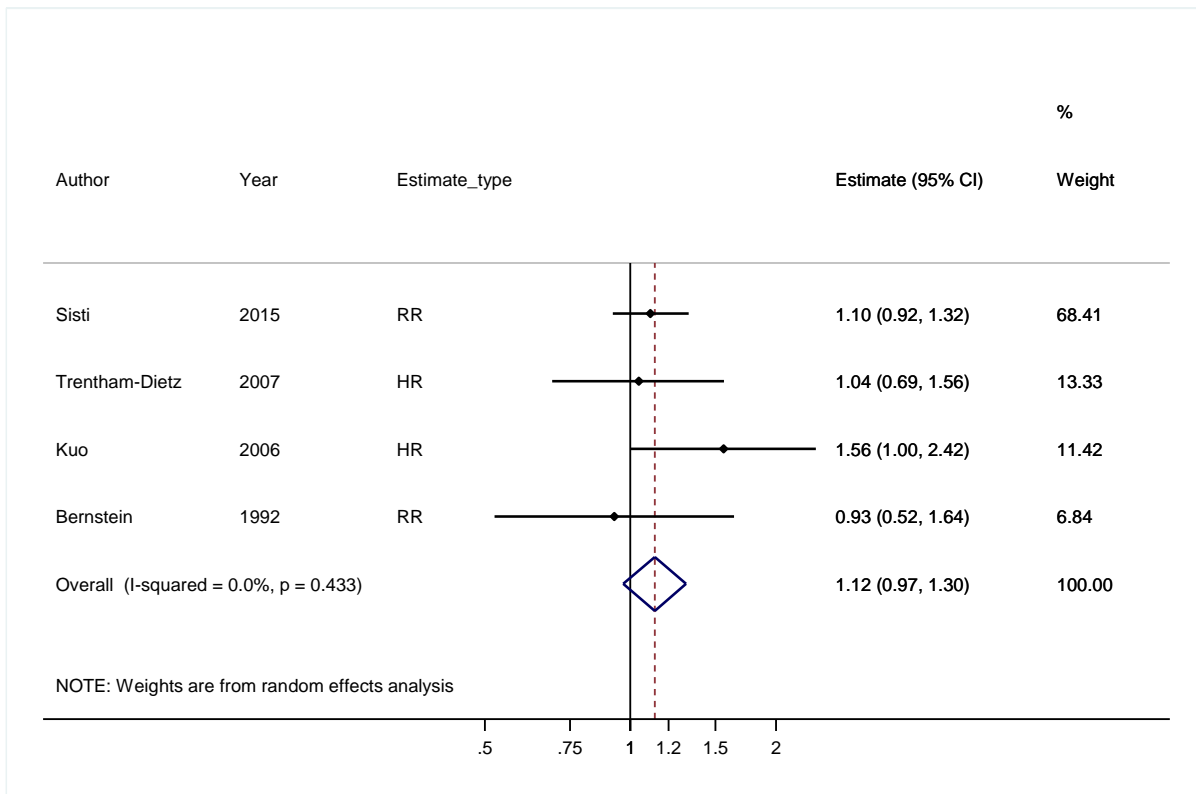

**Supplementary Figure S15: Forest plot of the included publications publishing adjusted estimates on the risk of developing contralateral breast cancer in population-based cohorts comparing postmenopausal women with premenopausal women.**

Author=first author; Year=year of publication; Estimate\_type=type of risk estimate provided, which can be a relative risk (RR), odds ratio (OR), hazard ratio (HR); Estimate=reported adjusted estimate (i.e. relative risk, odds ratio or hazard ratio); Weight=value assigned by random-effects analysis using the inverse of the study variance (variance includes within-study variance plus the between-study variance); Overall=relative risk estimate combining relative risks, odds ratios and hazard ratios; I-squared=measure of heterogeneity; p-value=p-value for heterogeneity,  $p < 0.05$  considered significant.



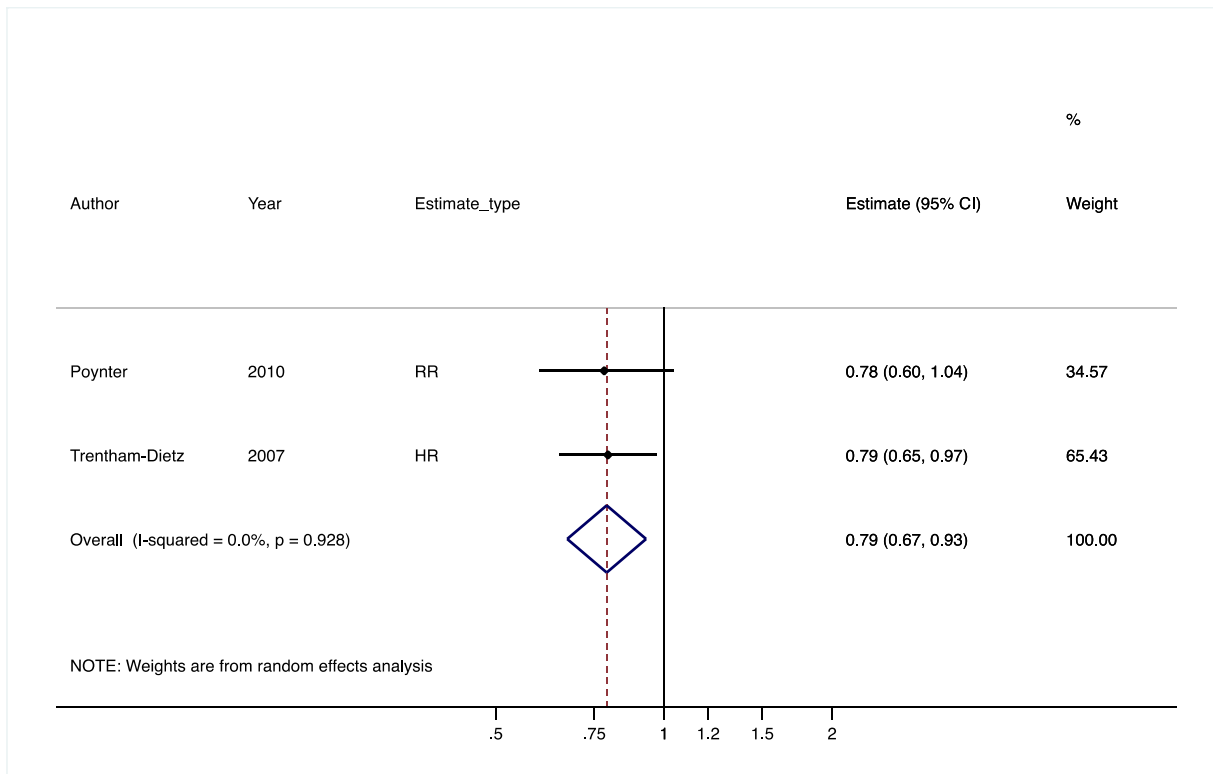

**Supplementary Figure S16: Forest plot of the included publications publishing adjusted estimates on the risk of developing contralateral breast cancer in population-based cohorts comparing age at menopause (years): <45 vs ≥45.**

Author=first author; Year=year of publication; Estimate\_type=type of risk estimate provided, which can be a relative risk (RR), odds ratio (OR), hazard ratio (HR); Estimate=reported adjusted estimate (i.e. relative risk, odds ratio or hazard ratio); Weight=value assigned by random-effects analysis using the inverse of the study variance (variance includes within-study variance plus the between-study variance); Overall=relative risk estimate combining relative risks, odds ratios and hazard ratios; I-squared=measure of heterogeneity; p-value=p-value for heterogeneity, p<0.05 considered significant.
